# Supplementary material
Source: MDPI journal article supplement (https://www.mdpi.com/2073-4352/13/8/1217)
Supplement: s1 [file s1]

# Mn(III)–Salen Complexes with Metallophilic Interactions

Tomáš Šilha, Radovan Herchel and Ivan Nemec \*

Department of Inorganic Chemistry, Faculty of Science, Palacký University, 17. listopadu 12,  
CZ-77147 Olomouc, Czech Republic; tomas.silha@upol.cz (T.Š.); radovan.herchel@upol.cz (R.H.)

\* Correspondence: ivan.nemec@upol.cz

**Table S1**

Crystal data and details of structure determination of complexes **1a–1c**

| Compound                                                               | <b>1a</b>                                                                                     | <b>1b</b>                                                                                     | <b>1c</b>                                                                                                     |
|------------------------------------------------------------------------|-----------------------------------------------------------------------------------------------|-----------------------------------------------------------------------------------------------|---------------------------------------------------------------------------------------------------------------|
| Formula                                                                | C <sub>30</sub> H <sub>32</sub> N <sub>6</sub> O <sub>2</sub> Mn <sub>1</sub> Ag <sub>1</sub> | C <sub>27</sub> H <sub>26</sub> N <sub>4</sub> O <sub>5</sub> Mn <sub>1</sub> Ag <sub>1</sub> | C <sub>18</sub> H <sub>12</sub> N <sub>4</sub> O <sub>2</sub> Cl <sub>2</sub> Mn <sub>1</sub> Ag <sub>1</sub> |
| Formula weight                                                         | 671.43                                                                                        | 649.33                                                                                        | 550.03                                                                                                        |
| Crystal system                                                         | triclinic                                                                                     | monoclinic                                                                                    | monoclinic                                                                                                    |
| Space group                                                            | P $\bar{1}$                                                                                   | C2/c                                                                                          | Cc                                                                                                            |
| Cell parameters                                                        |                                                                                               |                                                                                               |                                                                                                               |
| <i>a</i> /Å                                                            | 11.9239(7)                                                                                    | 22.9665(4)                                                                                    | 11.9580(6)                                                                                                    |
| <i>b</i> /Å                                                            | 11.9781(8)                                                                                    | 16.8217(4)                                                                                    | 17.1565(5)                                                                                                    |
| <i>c</i> /Å                                                            | 12.3813(5)                                                                                    | 18.4274(4)                                                                                    | 10.9641(5)                                                                                                    |
| $\alpha$ /°                                                            | 114.351(5)                                                                                    | 90                                                                                            | 90.00                                                                                                         |
| $\beta$ /°                                                             | 92.934(4)                                                                                     | 132.066(2)                                                                                    | 116.146(6)                                                                                                    |
| $\gamma$ /°                                                            | 115.864(7)                                                                                    | 90                                                                                            | 90.00                                                                                                         |
| <i>V</i> /Å <sup>3</sup>                                               | 1390.9(16)                                                                                    | 5285.1(3)                                                                                     | 2019.20(18)                                                                                                   |
| <i>Z</i>                                                               | 2                                                                                             | 8                                                                                             | 4                                                                                                             |
| <i>T</i> /K                                                            | 150.0(2)                                                                                      | 150.0(2)                                                                                      | 150.0(2)                                                                                                      |
| Density, <i>D<sub>c</sub></i> /g cm <sup>-3</sup>                      | 1.603                                                                                         | 1.632                                                                                         | 1.809                                                                                                         |
| Abs. coefficient /mm                                                   | 1.197                                                                                         | 1.264                                                                                         | 1.881                                                                                                         |
| <i>F</i> (000)                                                         | 684                                                                                           | 2624                                                                                          | 1080                                                                                                          |
| Data/restraints/param.                                                 | 4881/0/379                                                                                    | 4640/3/359                                                                                    | 2546/2/254                                                                                                    |
| R <sub>1</sub> <sup>a</sup> , wR <sub>2</sub> <sup>b</sup> (all data)  | 0.1007/0.2124                                                                                 | 0.0548/0.1283                                                                                 | 0.0238/0.0473                                                                                                 |
| R <sub>1</sub> <sup>a</sup> , wR <sub>2</sub> <sup>b</sup> [I > 2σ(I)] | 0.0742/0.2029                                                                                 | 0.0420/0.1232                                                                                 | 0.0209/0.0466                                                                                                 |
| Goodness of fit                                                        | 1.008                                                                                         | 1.081                                                                                         | 0.986                                                                                                         |
| CSD number                                                             | 2280645                                                                                       | 2280646                                                                                       | 2280648                                                                                                       |

<sup>a</sup>  $R_1 = \sum (|F_o| - |F_c|) / \sum |F_o|$ .

<sup>b</sup>  $wR^2 = \{ \sum [w(F^2_o - F^2_c)^2] / \sum [w(F^2_o)^2] \}^{1/2}$

**Table S2**Crystal data and details of structure determination of complexes **2a** and **2b**

| Compound                                                                                              | <b>2a</b>                                                                                     | <b>2b</b>                                                                                     |
|-------------------------------------------------------------------------------------------------------|-----------------------------------------------------------------------------------------------|-----------------------------------------------------------------------------------------------|
| Formula                                                                                               | C <sub>30</sub> H <sub>32</sub> N <sub>6</sub> O <sub>2</sub> Mn <sub>1</sub> Au <sub>1</sub> | C <sub>22</sub> H <sub>24</sub> N <sub>4</sub> O <sub>5</sub> Mn <sub>1</sub> Au <sub>1</sub> |
| Formula weight                                                                                        | 760.52                                                                                        | 676.364                                                                                       |
| Crystal system                                                                                        | monoclinic                                                                                    | triclinic                                                                                     |
| Space group                                                                                           | I 2/a                                                                                         | P $\bar{1}$                                                                                   |
| Cell parameters                                                                                       |                                                                                               |                                                                                               |
| <i>a</i> /Å                                                                                           | 12.6088(3)                                                                                    | 12.1625(3)                                                                                    |
| <i>b</i> /Å                                                                                           | 11.9439(2)                                                                                    | 13.8886(5)                                                                                    |
| <i>c</i> /Å                                                                                           | 19.0469(4)                                                                                    | 15.3678(5)                                                                                    |
| $\alpha$ /°                                                                                           | 90.00                                                                                         | 94.305(3)                                                                                     |
| $\beta$ /°                                                                                            | 94.951(2)                                                                                     | 106.002(3)                                                                                    |
| $\gamma$ /°                                                                                           | 90.00                                                                                         | 110.229(3)                                                                                    |
| <i>V</i> /Å <sup>3</sup>                                                                              | 2857.73(10)                                                                                   | 2299.27(15)                                                                                   |
| <i>Z</i>                                                                                              | 4                                                                                             | 2                                                                                             |
| <i>T</i> /K                                                                                           | 294(2)                                                                                        | 150.0(2)                                                                                      |
| Density, <i>D<sub>c</sub></i> /g cm <sup>-3</sup>                                                     | 1.768                                                                                         | 1.954                                                                                         |
| Abs. coefficient /mm                                                                                  | 13.418                                                                                        | 6.964                                                                                         |
| <i>F</i> (000)                                                                                        | 1496                                                                                          | 1312                                                                                          |
| Data/restraints/param                                                                                 | 2611/13/180                                                                                   | 15796/13/659                                                                                  |
| <i>R</i> <sub>1</sub> <sup>a</sup> , <i>wR</i> <sub>2</sub> <sup>b</sup> (all data)                   | 0.0460/0.1283                                                                                 | 0.0390/0.0524                                                                                 |
| <i>R</i> <sub>1</sub> <sup>a</sup> , <i>wR</i> <sub>2</sub> <sup>b</sup> [ <i>I</i> > 2σ( <i>I</i> )] | 0.0433/0.1260                                                                                 | 0.0244/0.0502                                                                                 |
| Goodness of fit                                                                                       | 1.122                                                                                         | 0.9022                                                                                        |
| CSD number                                                                                            | 2280644                                                                                       | 2280647                                                                                       |

<sup>a</sup>  $R_1 = \sum (|F_o| - |F_c|) / \sum |F_o|$

<sup>b</sup>  $wR^2 = \{ \sum [w(F_o^2 - F_c^2)^2] / \sum [w(F_o^2)^2] \}^{1/2}$

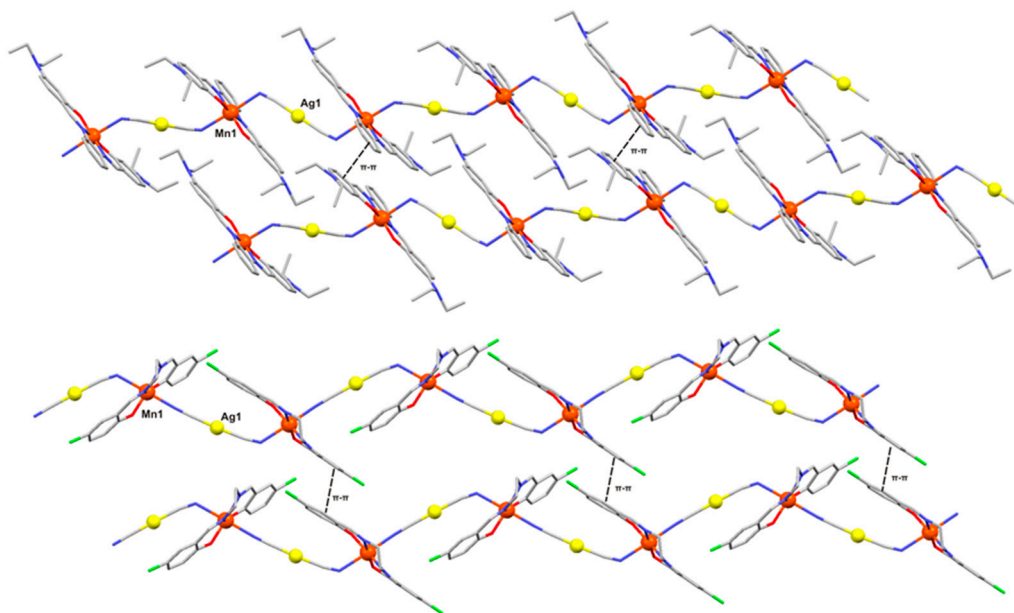

**Figure S1** Projection along the *c*-axis for the complex **1a** (above) and complex **1c** (below), showing a 2D network structure, in which are shown  $\pi$ - $\pi$  interaction between two 1D polymeric networks. The hydrogen atoms are omitted for clarity.

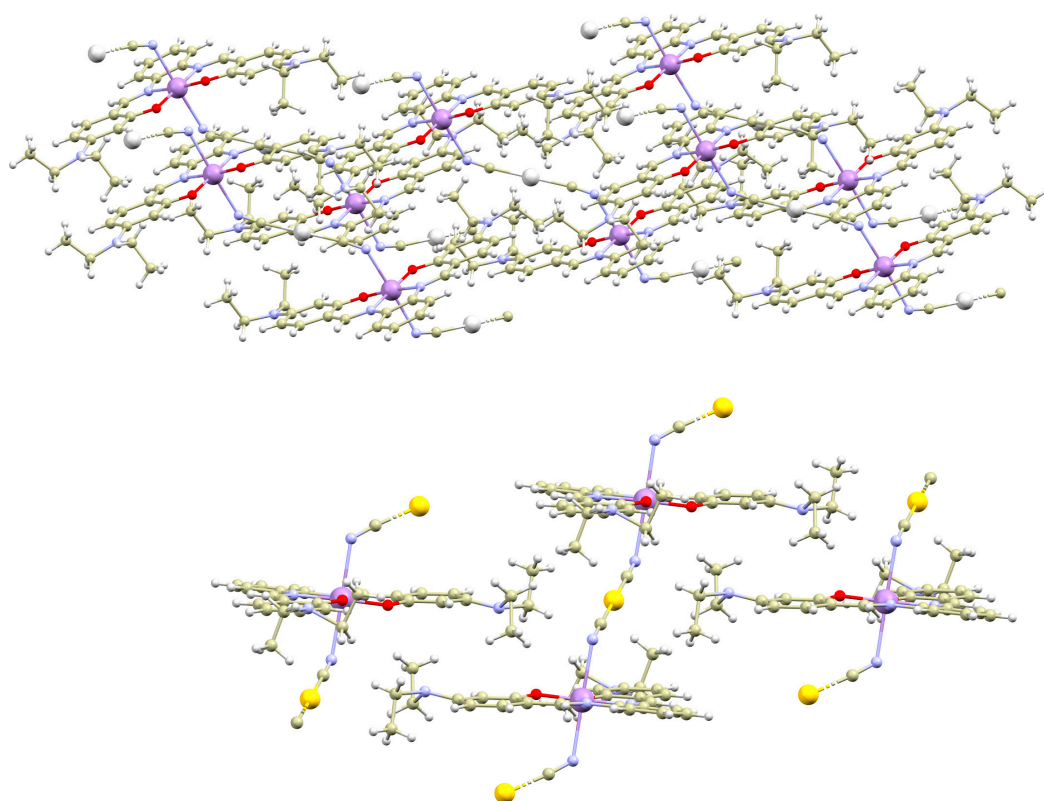

**Figure S2** A perspective view illustrating localization of the Ag/Au atoms in **1a** (above) and **2a** (below).

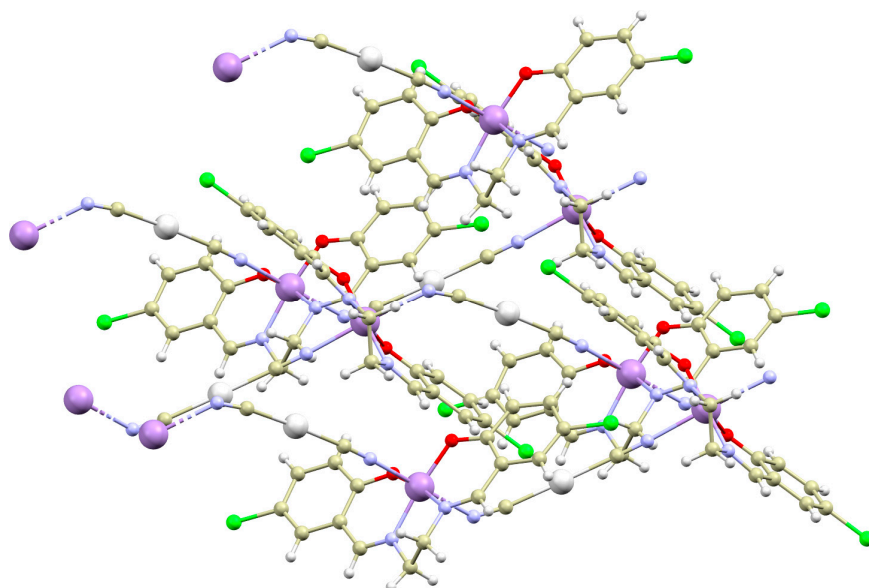

**Figure S3** A perspective view illustrating localization of the Ag atoms in **1c**

**Table S3** Topological and energetic properties of  $\rho(\mathbf{r})$  calculated for interactions involving Ag/Au atoms. All the values are listed, having a.u. units, except for  $E_{\text{int}}$  (kcal/mol).

| Compound  | type    | BCP    | $G(\mathbf{r})$ | $V(\mathbf{r})$ | $E_{\text{int}}$ | $-V(\mathbf{r})/G(\mathbf{r})$ | $h_{\text{e}}(\mathbf{r})$ | $\nabla^2 \rho(\mathbf{r})$ |
|-----------|---------|--------|-----------------|-----------------|------------------|--------------------------------|----------------------------|-----------------------------|
| <b>1b</b> | Ag...C  | (3,-1) | 0.00566         | -0.00469        | 1.47             | 0.83                           | 0.0009695                  | 0.026511                    |
| <b>2b</b> | Au...Au | (3,-1) | 0.00901         | -0.00833        | 2.61             | 0.92                           | 0.0006856                  | 0.038795                    |
| DOKDOY    | Au...Au | (3,-1) | 0.00762         | -0.00705        | 2.21             | 0.93                           | 0.0005706                  | 0.032753                    |
| GIMGAL    | Ag...Ag | (3,-1) | 0.01267         | -0.01382        | 4.34             | 1.09                           | -0.001155                  | 0.046059                    |
| TIJDOG    | Ag...Ag | (3,-1) | 0.01248         | -0.01361        | 4.27             | 1.09                           | -0.001126                  | 0.045419                    |
| TIJDUM    | Au...Au | (3,-1) | 0.01601         | -0.01666        | 5.23             | 1.04                           | -0.000657                  | 0.061392                    |
| WUJGIR    | Ag...O  | (3,-1) | 0.00573         | -0.00514        | 1.61             | 0.90                           | 0.000589                   | 0.025281                    |
|           |         | (3,-1) | 0.00392         | -0.00327        | 1.03             | 0.83                           | 0.000643                   | 0.018246                    |

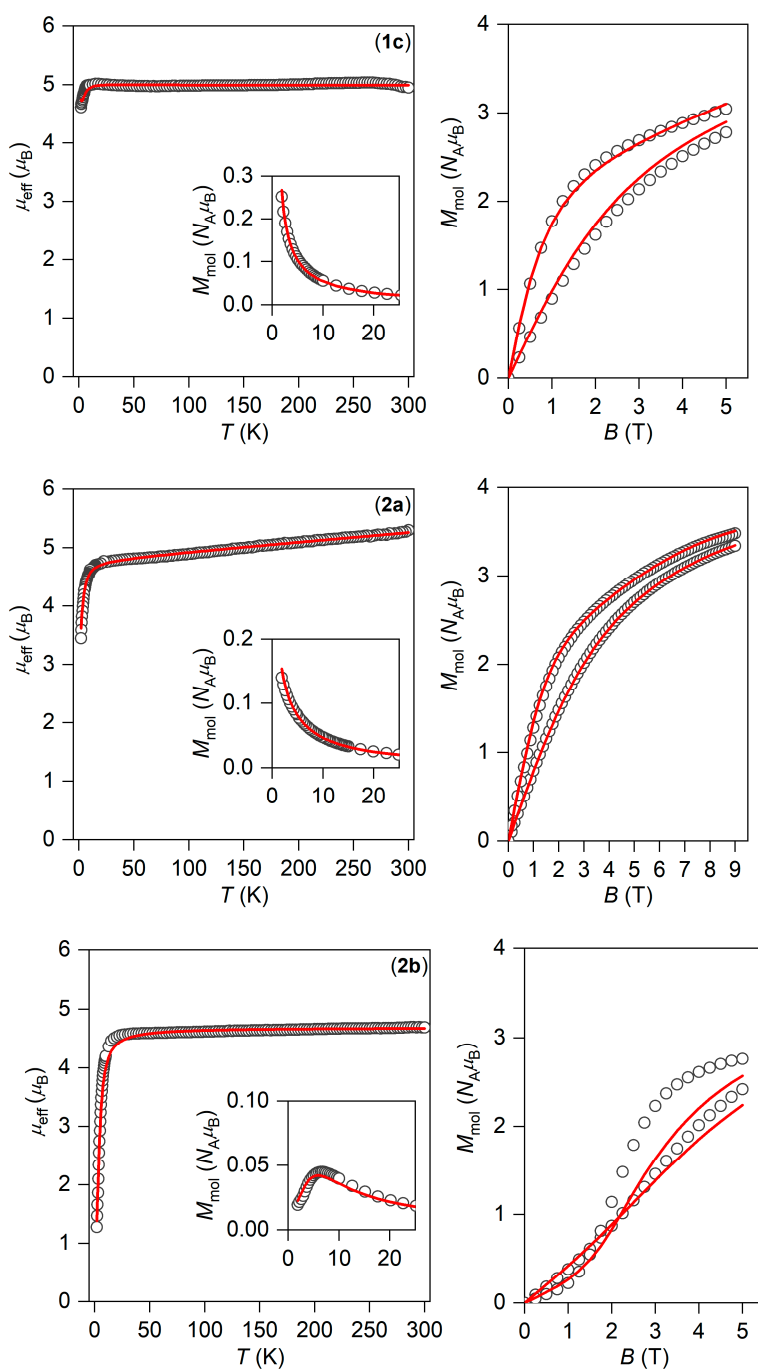

**Figure S4** Temperature dependence of the effective magnetic moment and the molar magnetization (inset), and the isothermal magnetizations measured at  $T = 2$  and 5 K for **1c**, **2a**, and **2b**. Empty circles – experimental data, full lines – calculated data with parameters in the text. All data are scaled per one Mn(III) ion.

**Table S4** The results of BS-DFT calculations for **1a-2b**.

|                                                                                                  | Spin Hamiltonian $-2J \times S_A \times S_B$    |                                                                             |                                                                          |
|--------------------------------------------------------------------------------------------------|-------------------------------------------------|-----------------------------------------------------------------------------|--------------------------------------------------------------------------|
| fragment                                                                                         | $J/\text{cm}^{-1}$ calculated using:            |                                                                             |                                                                          |
|                                                                                                  | $-(E_{\text{HS}}-E_{\text{BS}})/S_{\text{max}}$ | $-(E_{\text{HS}}-E_{\text{BS}})/(S_{\text{max}} \times (S_{\text{max}}+1))$ | $-(E_{\text{HS}}-E_{\text{BS}})/(S_{\text{HS}}^2 - S_{\text{BS}}^2 + 1)$ |
| <b>1a</b><br>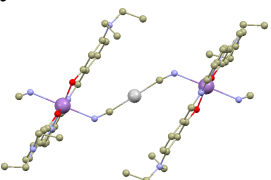   | 0.0                                             | 0.0                                                                         | 0.0                                                                      |
| <b>1b</b><br>   | 0.0                                             | 0.0                                                                         | 0.0                                                                      |
| <b>1b</b><br>   | -0.46                                           | -0.37                                                                       | -0.46                                                                    |
| <b>1c</b><br> | 0.0                                             | 0.0                                                                         | 0.0                                                                      |
| <b>2a</b><br> | 0.0                                             | 0.0                                                                         | 0.0                                                                      |
| <b>2b</b><br> | -0.60                                           | -0.48                                                                       | -0.60                                                                    |
| <b>2b</b><br> | -0.56                                           | 0.44                                                                        | -0.56                                                                    |
| <b>2b</b><br> | 0.0                                             | 0.0                                                                         | 0.0                                                                      |

**Table S5** The results of BS-DFT calculations for Mn(III) salen-based complexes with  $[\text{Ag}/\text{Au}(\text{CN})_2]^-$  bridging complexes.

| fragment                                                                                             | Spin Hamiltonian $-2J \times S_A \times S_B$      |                                                                                 |                                                                            |
|------------------------------------------------------------------------------------------------------|---------------------------------------------------|---------------------------------------------------------------------------------|----------------------------------------------------------------------------|
|                                                                                                      | $J/\text{cm}^{-1}$ calculated using:              |                                                                                 |                                                                            |
|                                                                                                      | $-(E_{\text{HS}} - E_{\text{BS}})/S_{\text{max}}$ | $-(E_{\text{HS}} - E_{\text{BS}})/(S_{\text{max}} \times (S_{\text{max}} + 1))$ | $-(E_{\text{HS}} - E_{\text{BS}})/(S_{\text{HS}}^2 - S_{\text{BS}}^2 + 1)$ |
| <b>DOKDOY</b><br>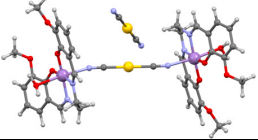   | 0.0                                               | 0.0                                                                             | 0.0                                                                        |
| <b>DOKDOY</b><br>   | 0.0                                               | 0.0                                                                             | 0.0                                                                        |
| <b>GIMGAL</b><br>   | 0.0                                               | 0.0                                                                             | 0.0                                                                        |
| <b>GIMGAL</b><br>  | -0.59                                             | -0.47                                                                           | -0.59                                                                      |
| <b>TIJDUM</b><br> | 0.0                                               | 0.0                                                                             | 0.0                                                                        |
| <b>TIJDOG</b><br> | 0.0                                               | 0.0                                                                             | 0.0                                                                        |
| <b>WUJGIR</b><br> | 0.0                                               | 0.0                                                                             | 0.0                                                                        |
